# Supplementary material for: Discovery and language model-guided design of hyperactive transposase
Source: Research Square preprint supplement (doi:10.21203/rs.3.rs-5536951/v1), 2024-12-08
Supplement: Supplementary file 1 [file 2018484d188c41f5ee4e3a33.pdf]

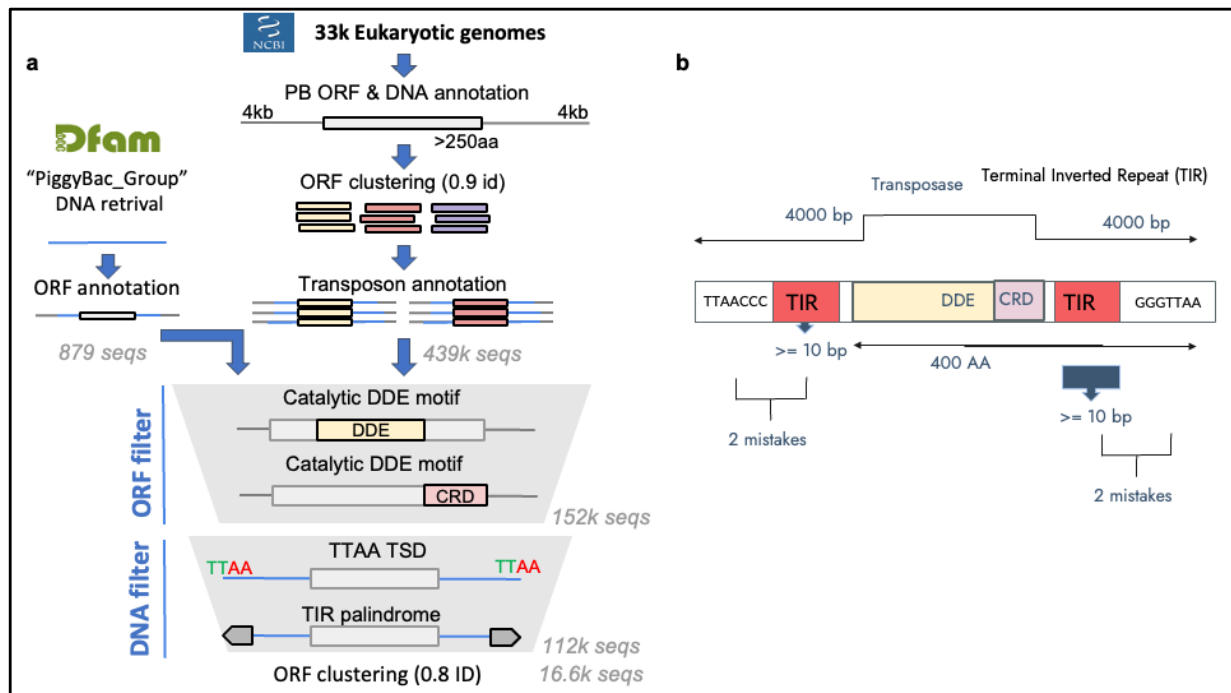

**Supplementary Figure 1 | PiggyBac bioprospecting pipeline. a)** Detailed of PiggyBac bioprospecting pipeline. Eukaryotic genomes were downloaded from ncbi and PiggyBac transposase ORFs were identified with HMM based search. ORFs were clustered at 0.9 id and DNA sequences spanning the ORF and 4kb at each end were fetched and aligned to annotate the transposase. In paralel, PiggyBac transposases from Dfam were retrieved. Putative transposon sequences were then filtered. ORFs were filtered to contain a catalytic DDE(D) triad, and corresponding cysteines in the ZnF containing cysteine rich domain (CRD). DNA ends were filtered to contain TTAA target strand duplication (TSD), and at least one terminally inverted palindrome. After applying the ORF and the DNA filters, ORF clustering at 0.8 was performed to obtain the final dataset. TIR and TSD DNA filtering removed 5,000 sequences (~2%) suggesting that feature conservation at the aminoacid level is a strong indicator of activity. **b)** Transposon DNA architecture and filtering details.

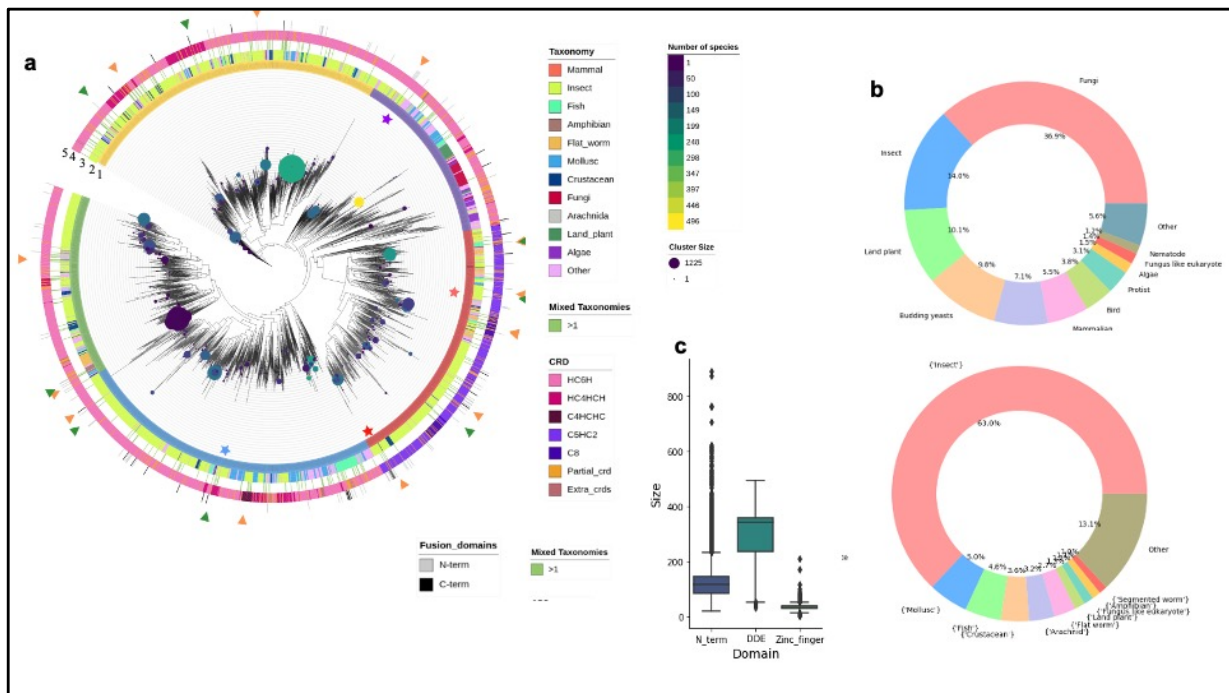

**Supplementary Figure 2 | Full piggyBac phylogenetic tree with legends. a)** PiggyBac tree from figure 1 showing all the ring legends. **b)** Taxonomic distribution of genomes included in the search (top) and piggyBac containing taxons (bottom). **c)** Size distribution of N-term, DDE and ZnF containing CRD domain.

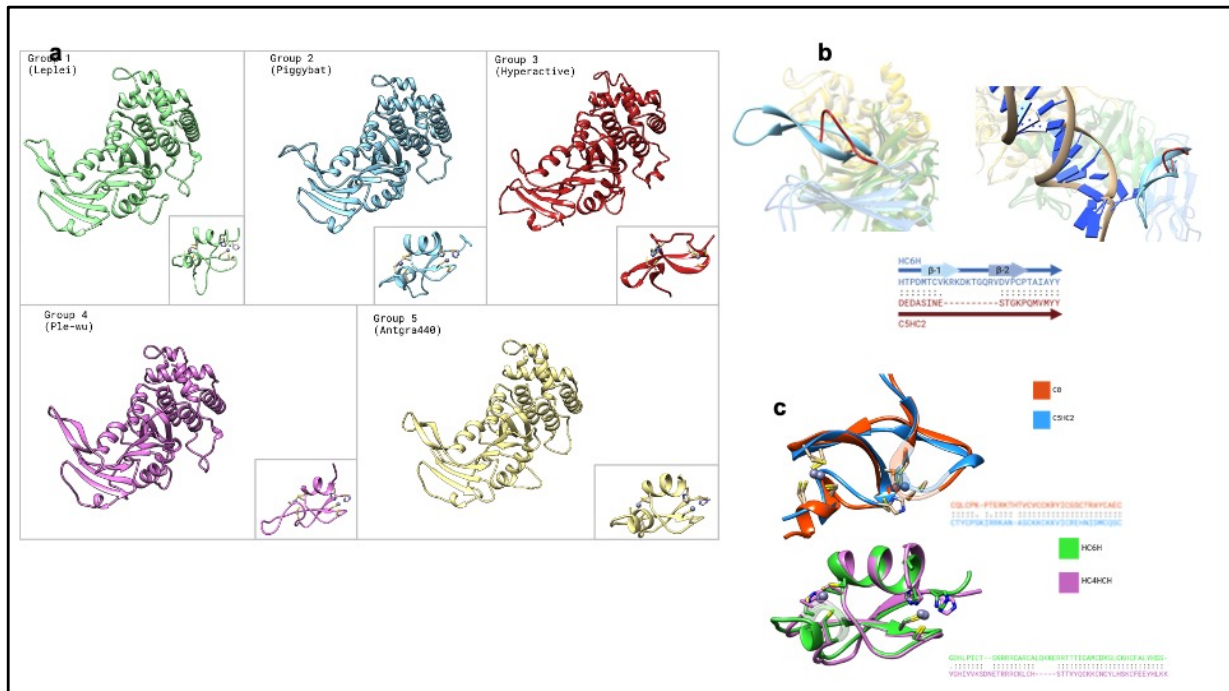

**Supplementary Figure 3 | Structural and phylogenetic alignment of discovered piggyBac groups.** **a)** Representative structures from the 5 mayor PB groups, where the DDE is the main structure and CRD is the additional representation. All of these representatives have been shown to poses activity. All the groups share a similar DDE structure while in CRD structure group 3 has a different fold. **b)** Structural alignment between representative integration domains from the two main ZnF groups, HC6H and C5HC2. The lack of two beta sheets is clearly seen in the C5HC2 PB. **c)** Structural alignment of the two mayor CRD groups together with their respective variants.

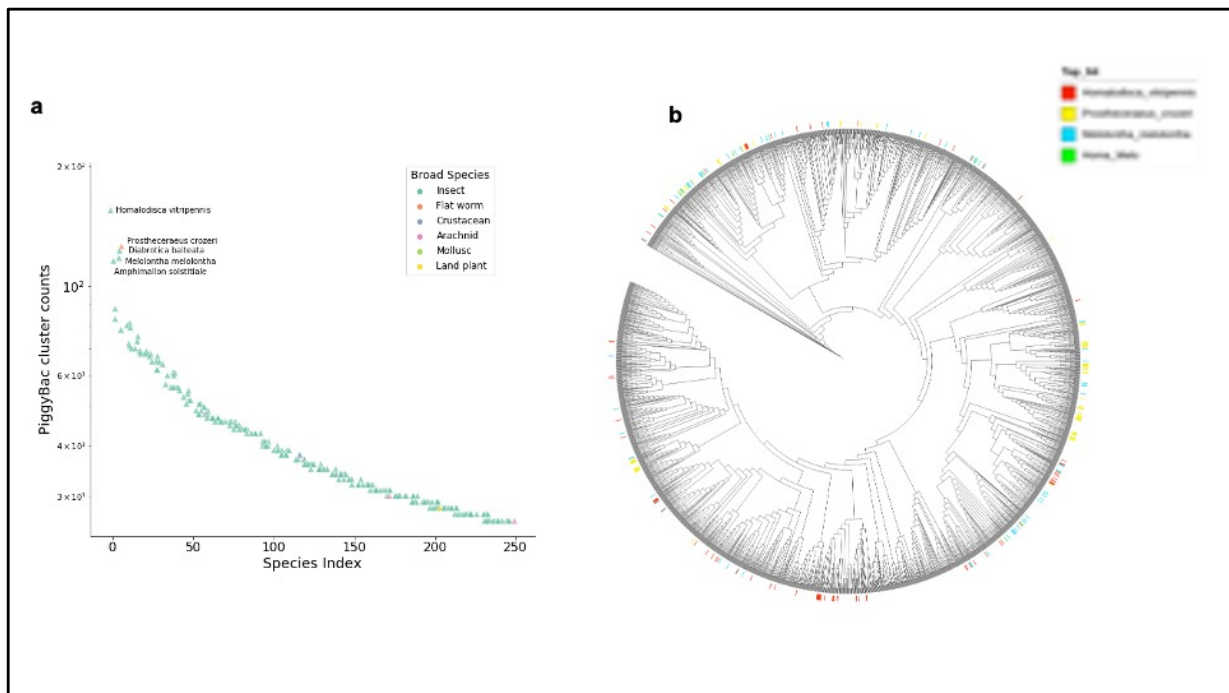

**Supplementary Figure 4 | piggyBac superhosts.** **a)** Species with most abundant representation of HyPB clusters, termed superhosts. **b)** PiggyBac clusters present in top 3 superhosts (*Homalodisca vitripennis*, *Prostheceraeus crozeri*, *Melolontha melolontha*) and the representation across the PiggyBac phylogenetic tree.

| Organized_domains                                        | count | average_length |
|----------------------------------------------------------|-------|----------------|
| DNA polymerase phi,DDE                                   | 105   | 587            |
| DDE, DNA replication regu...                             | 95    | 635.5          |
| DDE, WD40 associated re...                               | 77    | 595            |
| Zinc finger,DDE                                          | 76    | 602            |
| Herpes virus major out...                                | 71    | 644            |
| DDE, AF-4 proto-oncoprotein                              | 61    | 864            |
| Herpes virus major out..., Hamartin protein,DDE,Zin...   | 49    | 656            |
| Herpes virus major out...,DDE,Zinc finger                | 45    | 648            |
| Atrophin-1 family,DDE                                    | 44    | 848            |
| DDE, Rhodanase C-term...,Zinc finger                     | 36    | 564            |
| DNA polymerase phi,DDE,Zinc finger                       | 33    | 575            |
| Anaphase-promoting co...,DDE                             | 32    | 615            |
| Hamartin protein,DDE,Zinc finger                         | 31    | 648            |
| Pneumovirinae attac...,Mediator complex subunit...,D...  | 29    | 651            |
| YL1 nuclear protein,DDE                                  | 23    | 580            |
| Mitochondrial impor...,DNA polymerase phi,DDE            | 22    | 584            |
| Merozoite surface p...,DDE                               | 19    | 602            |
| Spumavirus gag pro...,Gametogenetin,DDE,Zinc fin...      | 19    | 609            |
| DDE, Proline-rich                                        | 17    | 541            |
| YL1 nuclear protein...,Nop14-like family,DDE             | 17    | 586            |
| Not1 N-terminal domain,DDE                               | 13    | 626            |
| Mitochondrial impor...,Zinc finger                       | 12    | 614.5          |
| DDE, Acetyl-CoA carboxylase                              | 12    | 573            |
| Procyclic acidic rep...,Surface protein,Ribosome...,D... | 12    | 586            |
| Treacher Collins sy...,Metaviral_G glycoprotein,D...     | 12    | 675            |

**Supplementary Figure 5 | Architectures of piggyBac transposases with fused domains.** Transposase fused domain architecture and abundance.

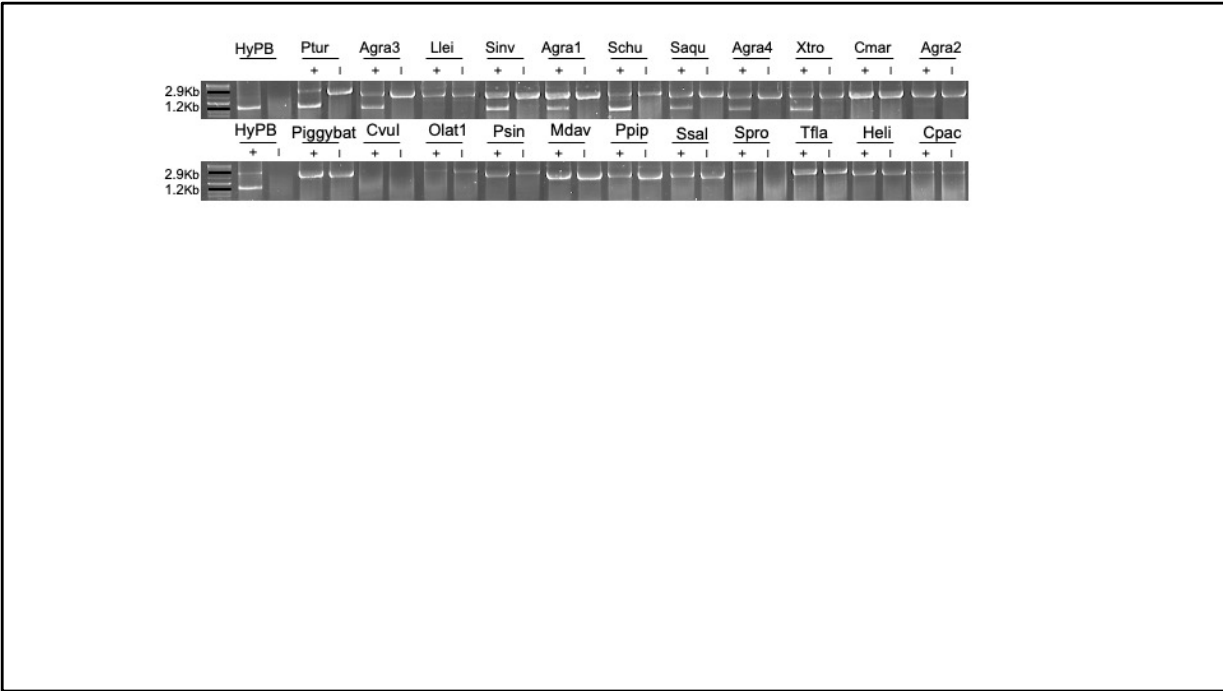

**Supplementary Figure 6 | DNA integration activities of active and inactive tested transposons.** Excision activity in the 25 transposons selected for experimental testing. Excision is measured by amplification of the transposon donor plasmid after transfection and isolation in HEK293T cells in presence (+) or absence (-) of corresponding transposase. 2.9Kb and 1.2kb bands, correspond to excised and non excised transposon fragment, respectively.

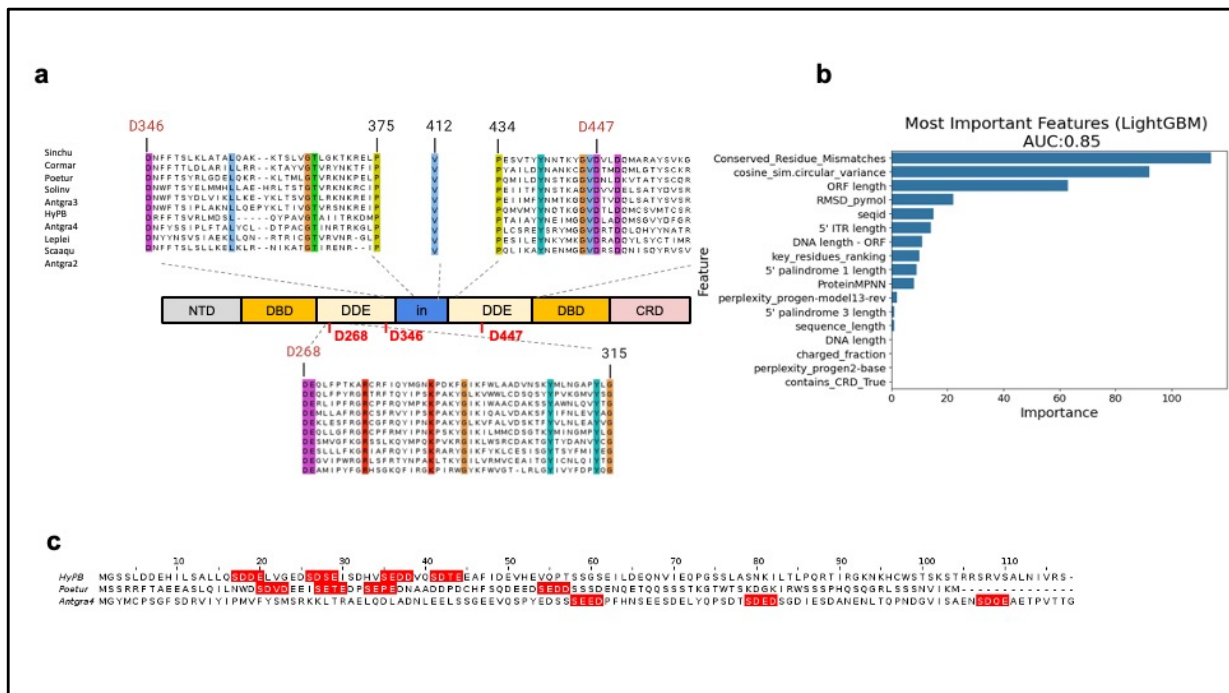

**Supplementary Figure 7 | Alignment of active piggyBacs and activity predicting model** **a)** Sequence alignment of active transposase sequences shows key relevant residues. Alignment is truncated to show conserved regions, full alignment in supplementary figure 2. **b)** Activity prediction LightGBM model built with aminoacid, DNA, and computational features to identify features contributing to activity of active vs inactive models. **c)** N-terminal domain showing CKII phosphorylation sites in HyPB, Poetur and Antgra4.

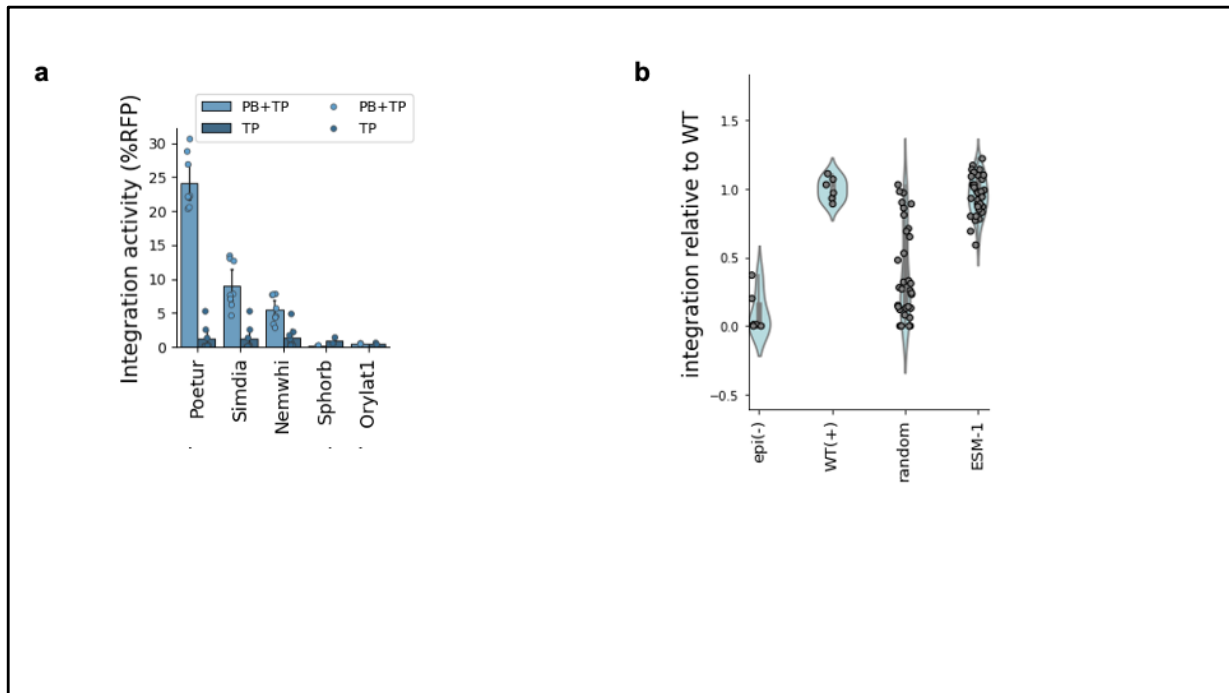

**Supplementary Figure 8 | BLAST search and ESM1v guided mutagenesis of Poetur** **a)** Integration levels of Poetur homolog sequences identified by Blast search and filtered. **b)** Relative long term transposition activity of randomly or ESM1v selected mutants, compared to WT (+) or absence of transposase, epi (-) . 12 ESM1v predicted top scoring mutants in a “zeroshot model” were selected.



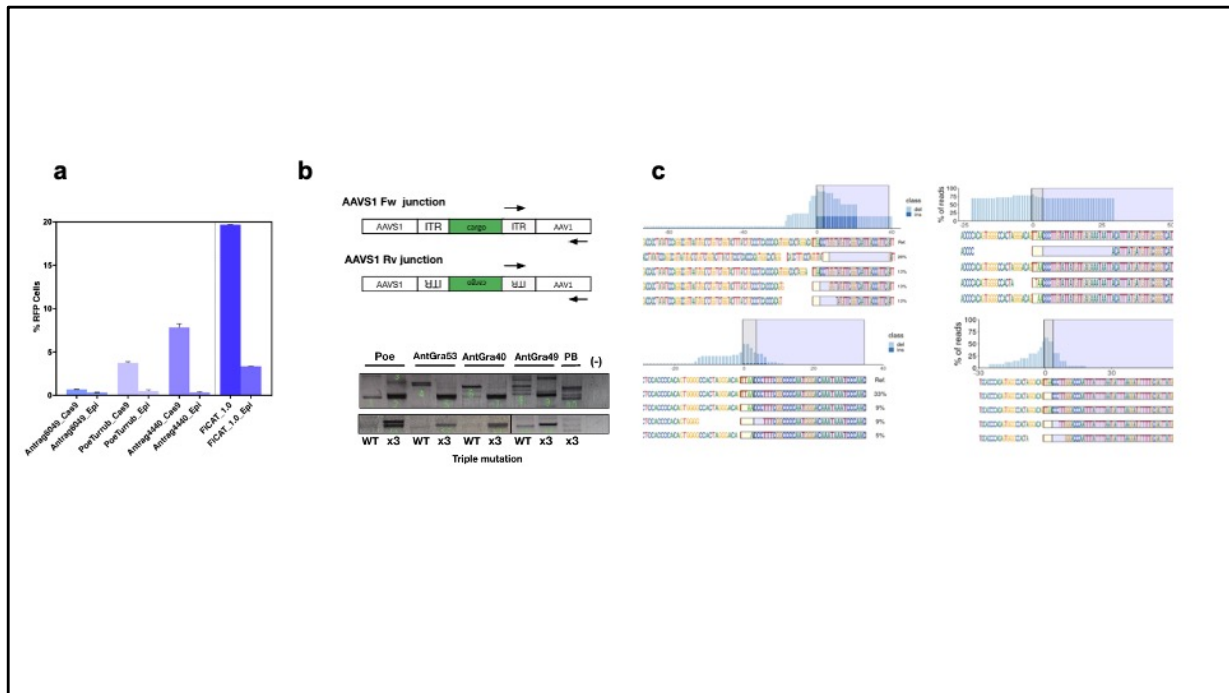

**Supplementary Figure 9 | Deployment of discovered transposases as FiCAT precise gene writing tools.** Top 3 PiggyBac Transposases identified in the bioprospecting screen were evaluated for programmable integration by co-transfection of Cas9, AAVS1 targeting gRNA and transposase-transposon plasmid pairs. Both WT sequence of piggybac ortholog and HyPB R372A/K375A /D450N excision+ integration- triple mutant equivalents were tested. (R372A/K375A /D450N are the most important residues for increasing on-target in FiCAT in respect to the HyPB sequence). **a)** RFP levels 3 weeks after transfection in HEK293T cells, representing stable integration. **b)** Junction PCR at the AAVS1-3 target site. **c)** NGS readout at the target site.

**a**

| Property                         | N-C Model | C-N Model |
|----------------------------------|-----------|-----------|
| Starting                         | 50281     | 50281     |
| After Removing Duplicates        | 50281     | 50237     |
| After Non Canonical Filter       | 50269     | 49550     |
| After Repeated Motifs Filter     | 47530     | 48517     |
| After CRD Filter                 | 45137     | 48517     |
| After SeqID Filter               | 43514     | 28129     |
| After Catalytic Site Filter      | 43513     | 27913     |
| After Alpha bridge filter        | 43510     | 27913     |
| After Hyperactive Residue filter | 1140      | 2019      |
| After Key Residue Filter         | 1115      | 2018      |

**b**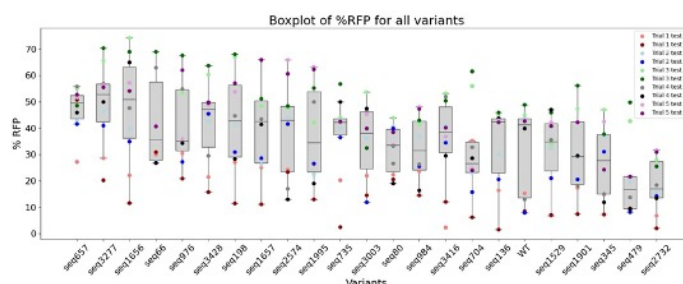

**Supplementary Figure 10 | AI generated variants.** **a)** Table of the criteria used to filter out low quality sequences from the set of progen generated sequences. In total 3133 sequences were remaining between the two models after these initial filtering steps. **b)** Shows all experimental %RFP values for the progen-generated sequences that were experimentally evaluated. Sequences are plotted on the y-axis and %RFP values are expressed on the Y-axis. The boxplot shows the 25% and 75% quartiles along with the median value. The points represent the different replicates and are color coded by replicate and trial.

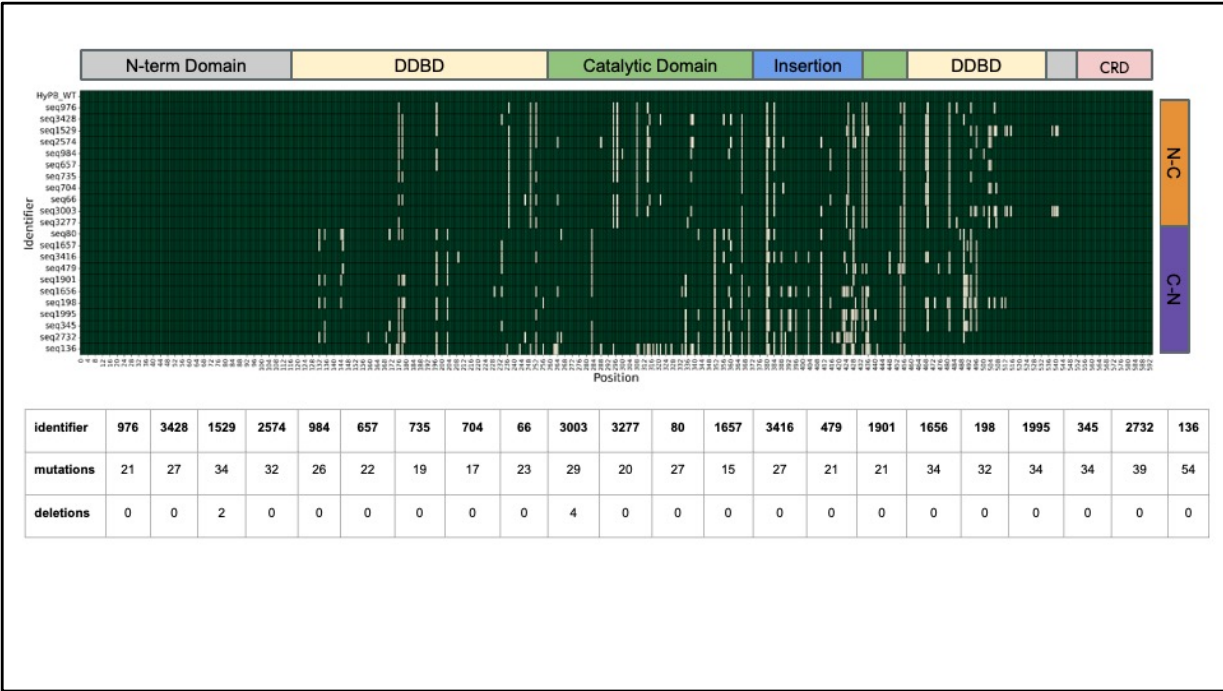

**Supplementary Figure 11 | Divergence of LLM generated sequences.** Heatmap displaying the positions of all mutations included in the progen-generated variants. Dark green represents unchanged positions and white represents the positions that have a mutated amino acid or a deletion. The Legend above is colored by structurally disordered regions (grey) dimerization and DNA-binding domains (yellow), catalytic domains (green), insertion domain (blue) and the cysteine rich domain (pink). The N-terminal Domain and CRD are unchanged because they were added back to the progen-generated variants. The sequence are ordered by which model they pertain to N-C based (orange) or C-N based (purple) model.

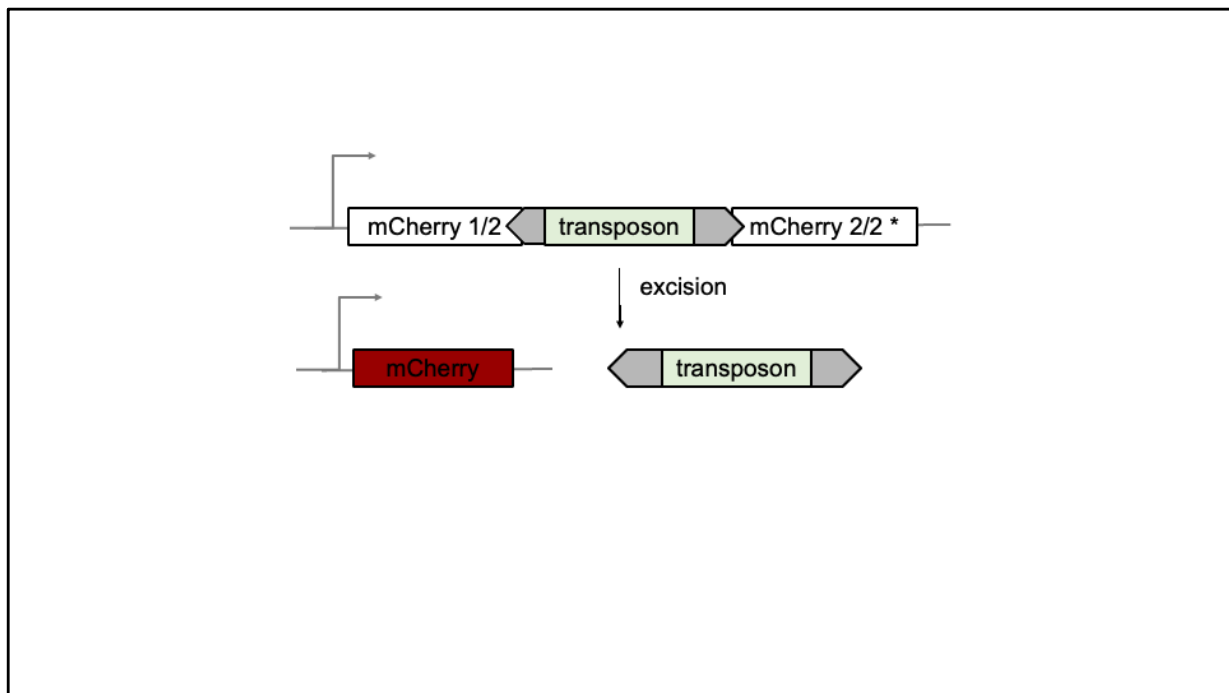

**Supplementary Figure 12 | Fluorescence excision assay.** Scheme of the fluorescence excision assay used to estimate transposase activity in HEK293T cells.
